# Supplementary material
Source: Springer Nature journal article supplement (https://www.springermedizin.de/resource/supplementary/13054_2011_9557_MOESM3_ESM.pdf/9706464)

**A**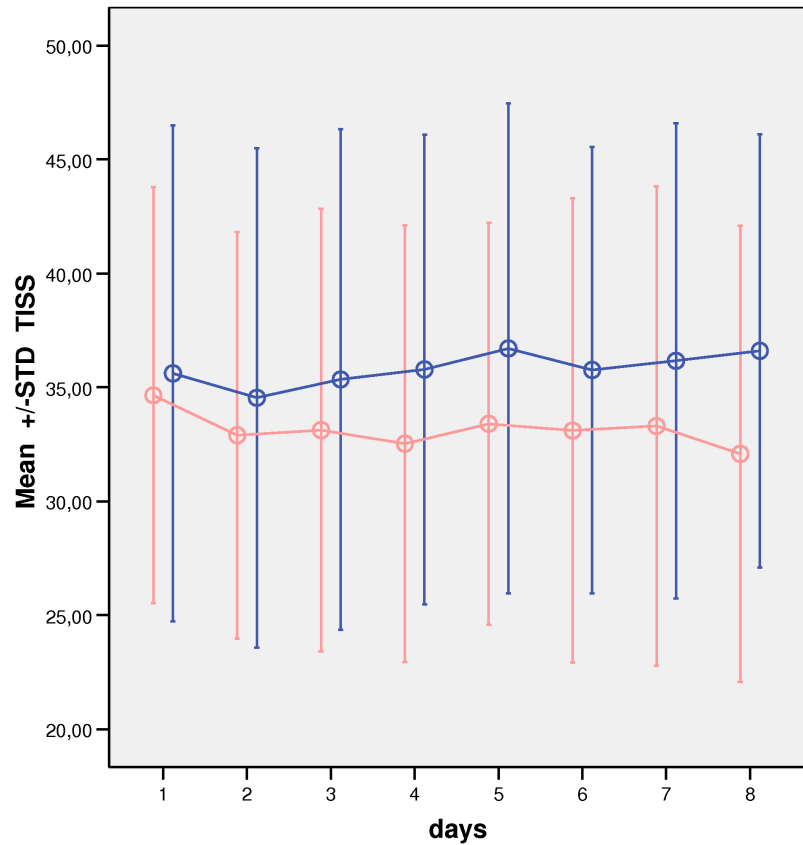**B**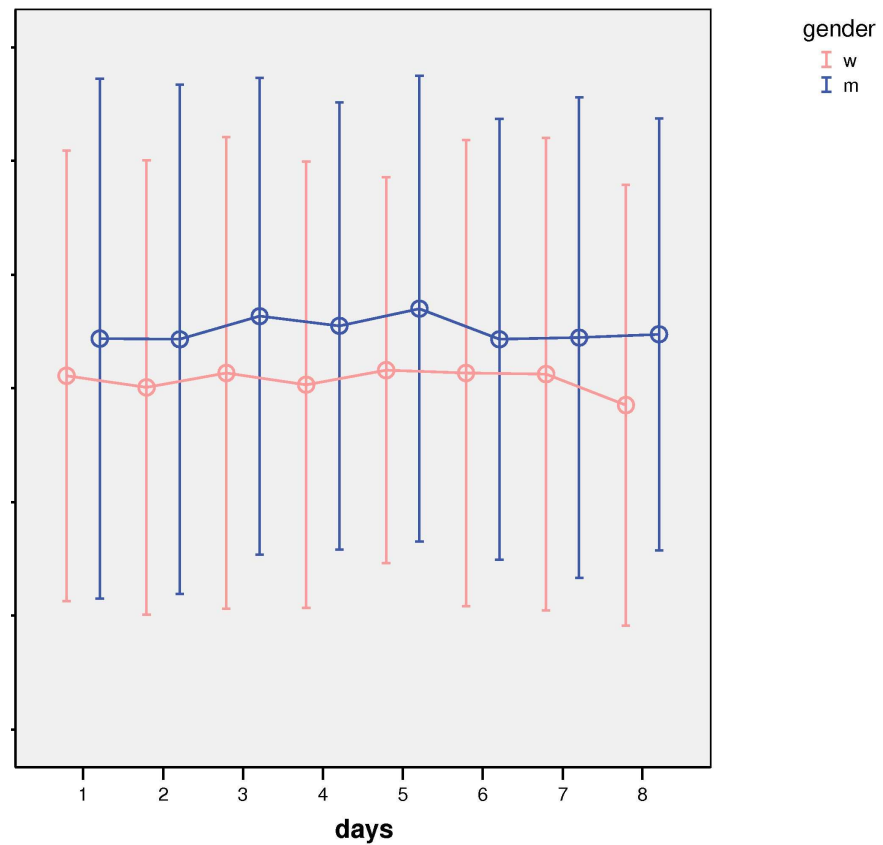

Supplement: MOESM3 [file 9706464]
